# Supplementary material for: Antigenic and Histopathologic Searching with Molecular Characterization and Identification of BPIV3 in Cattle with Symptoms of Respiratory System Infection
Source: Research Square preprint supplement (doi:10.21203/rs.3.rs-988482/v1), 2021-10-20
Supplement: Supplementary file 1 [file 4165919d10d09dc21f9beb39.docx]

| ***İsolates*** | **1** | **2** | **3** | **4** | **5** | **6** | **7** | **8** | **9** | **10** | **11** | **12** | **13** | **14** | **15** | **16** | **17** | **18** | **19** | **20** | **21** | **22** | **23** | **24** | **25** |
| --- | --- | --- | --- | --- | --- | --- | --- | --- | --- | --- | --- | --- | --- | --- | --- | --- | --- | --- | --- | --- | --- | --- | --- | --- | --- |
| **1** KT215610 | - |  |  |  |  |  |  |  |  |  |  |  |  |  |  |  |  |  |  |  |  |  |  |  |  |
| **2** NC028362 | 100 | - |  |  |  |  |  |  |  |  |  |  |  |  |  |  |  |  |  |  |  |  |  |  |  |
| **3** EU277658.1 | 66,33 | 66,33 | - |  |  |  |  |  |  |  |  |  |  |  |  |  |  |  |  |  |  |  |  |  |  |
| **4** KJ647284 | 67,27 | 67,27 | 89,16 | - |  |  |  |  |  |  |  |  |  |  |  |  |  |  |  |  |  |  |  |  |  |
| **5** KP764763 | 66,62 | 66,62 | 89,98 | 99,35 | - |  |  |  |  |  |  |  |  |  |  |  |  |  |  |  |  |  |  |  |  |
| **6** KJ647286 | 66,62 | 66,62 | 89,98 | 99,35 | 100 | - |  |  |  |  |  |  |  |  |  |  |  |  |  |  |  |  |  |  |  |
| **7** KY511410 | 62,58 | 62,58 | 82,74 | 80,28 | 80,28 | 80,28 | - |  |  |  |  |  |  |  |  |  |  |  |  |  |  |  |  |  |  |
| **8** MH357343 | 62,74 | 62,74 | 85,36 | 82,5 | 82,5 | 82,5 | 97,99 | - |  |  |  |  |  |  |  |  |  |  |  |  |  |  |  |  |  |
| **9** BUR/BPIV3 | 62,74 | 62,74 | 85,31 | 82,5 | 82,5 | 82,5 | 97,99 | 100 | - |  |  |  |  |  |  |  |  |  |  |  |  |  |  |  |  |
| **10** HQ530153 | 60,59 | 60,9 | 85,71 | 81,97 | 81,97 | 81,97 | 97,65 | 99,2 | 99,2 | - |  |  |  |  |  |  |  |  |  |  |  |  |  |  |  |
| **11** KU198929 | 60,59 | 60,59 | 85,71 | 81,97 | 81,97 | 81,97 | 97,65 | 99,2 | 99,2 | 100 | - |  |  |  |  |  |  |  |  |  |  |  |  |  |  |
| **12** KT071671 | 60,59 | 60,59 | 85,71 | 81,97 | 81,97 | 81,97 | 97,65 | 99,2 | 99,2 | 100 | 100 | - |  |  |  |  |  |  |  |  |  |  |  |  |  |
| **13** JX969001 | 63,52 | 63,52 | 81,85 | 79,34 | 79,34 | 79,34 | 96,59 | 97,31 | 97,31 | 96,97 | 96,97 | 96,97 | - |  |  |  |  |  |  |  |  |  |  |  |  |
| **14** KJ647287 | 60,47 | 60,47 | 82,84 | 80,39 | 80,39 | 80,39 | 97,3 | 98 | 98 | 96,97 | 97,67 | 97,67 | 98,68 | - |  |  |  |  |  |  |  |  |  |  |  |
| **15** KJ647285 | 61,27 | 61,27 | 82,32 | 80,94 | 80,94 | 80,94 | 96,94 | 97,65 | 97,65 | 97,31 | 97,31 | 97,31 | 99,02 | 99,02 | - |  |  |  |  |  |  |  |  |  |  |
| **16** LC040886 | 63,41 | 63,41 | 82,84 | 80,39 | 81,38 | 81,38 | 95,88 | 96,62 | 96,62 | 96,28 | 96,28 | 96,28 | 98,69 | 98,01 | 98,35 | - |  |  |  |  |  |  |  |  |  |
| **17** LC000638 | 63,41 | 63,41 | 81,9 | 79,9 | 79,9 | 79,9 | 96,59 | 97,31 | 97,31 | 96,98 | 96,98 | 96,98 | 99,35 | 98,69 | 99,02 | 98,69 | - |  |  |  |  |  |  |  |  |
| **18** AB770484 | 70,06 | 70,06 | 76,45 | 81,21 | 81,21 | 81,21 | 84,65 | 85,68 | 85,68 | 84,28 | 84,28 | 84,28 | 86,61 | 86,64 | 86,16 | 88,38 | 87,52 | - |  |  |  |  |  |  |  |
| **19** AB770485 | 70,06 | 70,06 | 76,45 | 81,21 | 81,21 | 81,21 | 84,65 | 85,68 | 85,68 | 84,28 | 84,28 | 84,28 | 86,61 | 86,64 | 86,16 | 88,38 | 87,52 | 100 | - |  |  |  |  |  |  |
| **20** KJ647289 | 65,39 | 65,39 | 78,08 | 78,58 | 78,58 | 78,58 | 79,28 | 80,45 | 80,45 | 81 | 81 | 81 | 80,89 | 82,02 | 80,39 | 81,91 | 81,91 | 89,34 | 89,34 | - |  |  |  |  |  |
| **21** KP757872 | 64,88 | 64,88 | 76,77 | 78,97 | 78,97 | 78,97 | 78,01 | 79,22 | 79,22 | 79,78 | 79,78 | 79,78 | 79,66 | 80,03 | 80,28 | 80,72 | 80,72 | 89,34 | 89,34 | 99,35 | - |  |  |  |  |
| **22** JQ063064 | 64,88 | 64,88 | 76,77 | 78,97 | 78,97 | 78,97 | 78,01 | 79,22 | 79,22 | 79,78 | 79,78 | 79,78 | 79,66 | 80,03 | 80,28 | 80,72 | 80,72 | 89,34 | 89,34 | 99,35 | 100 | - |  |  |  |
| **23** NC002161 | 67,87 | 67,87 | 78,01 | 81,6 | 81,6 | 81,6 | 80,56 | 80,62 | 80,62 | 81,16 | 81,16 | 81,16 | 82,7 | 82,75 | 82,22 | 84,61 | 83,68 | 92,44 | 92,44 | 93,43 | 93,46 | 93,46 | - |  |  |
| **24** AF178654 | 67,87 | 67,87 | 78,01 | 81,6 | 81,6 | 81,6 | 80,56 | 80,62 | 80,62 | 81,16 | 81,16 | 81,16 | 82,7 | 82,75 | 82,22 | 84,61 | 83,68 | 92,44 | 92,44 | 93,43 | 93,46 | 93,46 | 100 | - |  |
| **25** AF178655 | 67,77 | 67,77 | 79,6 | 80,6 | 80,6 | 80,6 | 81 | 82,12 | 82,12 | 82,65 | 82,65 | 82,65 | 83,12 | 83,17 | 82,65 | 84,1 | 84,1 | 92,03 | 92,03 | 94,6 | 94,62 | 94,62 | 99.02 | 99.02 | - |

The genetic closeness of the sequence obtained in the study and the sequences referenced from Genbank
